# Supplementary material for: Species-level determination of closely related araucarian resins using FTIR spectroscopy and its implications for the provenance of New Zealand amber
Source: PeerJ journal article supplement (doi:10.7717/peerj.1067), 2015-07-02
Supplement: Collection_permit_17778.pdf [file Collection_permit_17778.pdf]

PRÉSIDENCE

SECRETARIAT GÉNÉRAL

AMPLIATIONS

|                     |   |
|---------------------|---|
| Commissaire délégué | 1 |
| DENV                | 1 |
| Intéressé           | 1 |

N° 3287-2011/ARR/DENV

du : 7 NOV. 2011

**ARRÊTÉ**

**accordant à Monsieur Vincent PERRICHOT une autorisation relative à l'accès et à l'utilisation de ressources biologiques, génétiques et biochimiques**

**LE PREMIER VICE-PRÉSIDENT DE L'ASSEMBLÉE DE LA PROVINCE SUD**

Vu la loi organique modifiée n° 99-209 du 19 mars 1999 relative à la Nouvelle-Calédonie,

Vu le code de l'environnement ;

Vu le contrat accessoire passé entre la province Sud et le récolteur ;

Vu le rapport n°2055-2011/ARR du 4 novembre 2011,

**ARRÊTE**

**ARTICLE 1** : Monsieur Vincent Perrichot est autorisé à récolter les échantillons listés ci-dessous et à les utiliser à fins de recherche scientifique, et les transporter, sous réserve de l'observation des prescriptions énoncées à l'article 3.



| Famille                 | Genre                | Espèce               | Site de récolte envisagé<br>(avec indication du propriétaire foncier)                            | Type d'échantillon souhaité                         | Quantité nécessaire<br>(nombre ou poids) |
|-------------------------|----------------------|----------------------|--------------------------------------------------------------------------------------------------|-----------------------------------------------------|------------------------------------------|
| Araucariaceae           | <i>Araucaria</i>     | <i>columnaris</i>    | Port Boisé                                                                                       | cônes mâles et femelle, feuilles, coulées de résine | 1à2/<br>5à10/<br>50                      |
| Araucariaceae           | <i>Araucaria</i>     | <i>humboldtensis</i> | Mt Humboldt                                                                                      |                                                     |                                          |
| Araucariaceae           | <i>Agathis</i>       | <i>ovata</i>         | Col de Yaté, plaine des lacs, Madeleine, lac en 8, PPRB, Dzumac, Koghis                          |                                                     |                                          |
| Araucariaceae           | <i>Agathis</i>       | <i>lanceolata</i>    |                                                                                                  |                                                     |                                          |
| Araucariaceae           | <i>Agathis</i>       | <i>moorei</i>        |                                                                                                  |                                                     |                                          |
| Cycadaceae              | <i>Cycas</i>         | <i>spp.</i>          | Port Boisé                                                                                       |                                                     |                                          |
| Podocarpaceae           | <i>Dacrydium</i>     | <i>araucarioides</i> | Col de Yaté, plaine des lacs, Madeleine, lac en 8, PPRB, Dzumac, Koghis                          |                                                     |                                          |
| Podocarpaceae           | <i>Dacrydium</i>     | <i>balansae</i>      |                                                                                                  |                                                     |                                          |
| Podocarpaceae           | <i>Dacrydium</i>     | <i>lycopodioides</i> |                                                                                                  |                                                     |                                          |
| Podocarpaceae           | <i>Falcatifolium</i> | <i>taxoides</i>      |                                                                                                  |                                                     |                                          |
| Podocarpaceae           | <i>Dacrycarpus</i>   | <i>vieillardii</i>   |                                                                                                  |                                                     |                                          |
| Podocarpaceae           | <i>Acmopyle</i>      | <i>pancheri</i>      |                                                                                                  |                                                     |                                          |
| Champignons résinicoles | <i>Indéterminés</i>  | <i>Indéterminés</i>  | Mt Humboldt, Port Boisé, Col de Yaté, plaine des lacs, Madeleine, lac en 8, PPRB, Dzumac, Koghis | Fragments de quelques cm                            | 2 à 3 échantillons                       |
| Cryptogames             |                      |                      |                                                                                                  |                                                     |                                          |
| Arthropodes             | <i>Indéterminés</i>  | <i>Indéterminés</i>  | Mt Humboldt, Port Boisé, Col de Yaté, plaine des lacs, Madeleine, lac en 8, PPRB, Dzumac, Koghis | Quelques spécimens                                  | Quelques spécimens                       |

**ARTICLE 2 :** L'autorisation d'accès aux ressources est valable pour les sites mentionnés au tableau ci-dessus et jusqu'à la date du 31 décembre 2011.

Les aires protégées suivantes sont concernées : Mont Humboldt, chutes de la Madeleine et parc provincial de la Rivière Bleue.

Les espèces protégées suivantes sont concernées : *Cycas spp.*

Remarque : cette espèce est inscrite au tableau II de la convention CITES

**ARTICLE 3 :** Le projet décrit dans la demande susvisée doit être réalisé conformément aux conditions suivantes :

- La collecte au sein des réserves naturelles ou parcs n'est autorisée que pour les espèces dont les seuls peuplements connus ne se trouvent qu'au sein d'une ou plusieurs aires protégées.
- Sur un même lieu de collecte, et afin de maintenir les possibilités de régénération naturelle, l'intéressé s'engage à ne pas prélever, pour une même espèce, plus de 20% des graines disponibles (cônes femelles).
- Déposer tout holotype afférent à la mission au Muséum d'Histoire Naturelle à Paris.
- Dans le cadre de l'amélioration des connaissances et du suivi des espèces rares et menacées, le rapport annuel des collectes devra mentionner les coordonnées GPS des lieux de collecte, à minima pour les espèces protégées par le code de l'environnement de la province Sud (citées à l'article 2) ainsi que l'espèce suivante : *Agathis moorei*.

**ARTICLE 4 :** Une exonération des frais de dossier est accordée.

**ARTICLE 5 :** Le présent arrêté sera transmis à Monsieur le commissaire délégué de la République et notifié à l'intéressé.

Pour le président et par délégation  
Le directeur de l'environnement



J. FOURMY



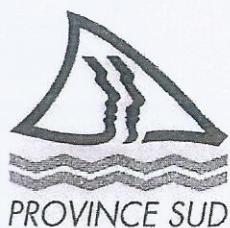

## REPUBLIQUE FRANCAISE

### DIRECTION DE L'ENVIRONNEMENT

19, avenue Foch, immeuble Foch, 2<sup>e</sup> étage  
BP 3718 - 98846 Nouméa cedex – Nouvelle-Calédonie –  
Tél : 24 32 55 – email : [denv.contact@province-sud.nc](mailto:denv.contact@province-sud.nc)  
Fax : (687) 24 32 56

---

**CONTRAT AUTORISANT  
L'ACCES A DES RESSOURCES BIOLOGIQUES, GENETIQUES ET  
BIOCHIMIQUES ET EN FIXANT LES CONTREPARTIES**

---

N° 17778

Entre :

**La province Sud, représentée par son président, M. Pierre FROGIER,**  
agissant ès qualité au nom et pour le compte de l'assemblée de la province Sud,  
ci-après dénommé "Le propriétaire foncier"

d'une part,

et :

..... GEOSCIENCES RENNES - CNRS - UNIVERSITE RENNES 1 .....,  
siège social : .....,  
ridet ..... Siret. n° 193 509 261 00161 .....,  
représentée par ..... VINCENT PERRICHOT .....,  
dûment habilité aux fins des présentes,  
ci-après dénommé "Le récolteur"

d'autre part,

### Préambule

Le code de l'environnement de la province Sud met en œuvre le principe de partage juste et équitable des bénéfices découlant de l'utilisation des ressources génétiques établi par la Convention sur la Diversité Biologique et les lignes directrices de la Convention de Bonn.

Désormais, le Titre 1<sup>er</sup> du Livre III, et plus précisément les articles 312-1 et 312-4 réglementent la collecte de ressources biologiques, génétiques et biochimiques. Lorsqu'une autorisation provinciale préalable est requise, elle est conditionnée par la signature d'un contrat définissant les conditions d'accès à la ressource.

#### Article 1 – Objet

Le présent contrat a pour objet de définir les modalités d'accès et de récolte de ressources génétiques, biochimiques ou biologiques sur un terrain appartenant au propriétaire foncier et de préciser les compensations financières et non financières concédées en contrepartie de l'accès accordé aux ressources.



## **Article 2 – Récolte des ressources**

Le propriétaire foncier autorise le récolteur à procéder à la collecte des espèces listées en annexe 1, dans les conditions fixées en annexe 2.

Le récolteur s'engage à informer le propriétaire foncier des dates et horaires des opérations de récolte dès qu'ils sont précisément établis.

Le récolteur s'engage à recourir aux méthodes de collecte garantissant le moindre impact sur la faune et la flore en présence.

## **Article 3 – Obligations des parties**

Le récolteur s'engage à ce que soit fait mention de l'origine des échantillons dans toute publication découlant directement des collectes effectuées dans le cadre du présent contrat.

Le propriétaire foncier s'engage à ne pas utiliser ou divulguer toute information figurant aux annexes 1 et 2.

## **Article 4 – Propriété des résultats – brevet**

Le présent contrat n'ouvre aucun droit de propriété sur les droits découlant des résultats des travaux scientifiques conduits par le récolteur, au-delà des compensations financières et non financières décrites à l'article 5.

## **Article 5- Compensations financières et non financières de l'accès aux ressources**

Le récolteur tiendra, au 31 mars de chaque année, un décompte annuel des revenus générés durant l'année fiscale précédente par ses travaux rendus possibles par la récolte effectuée dans le cadre du présent contrat.

Le récolteur concède, conformément aux dispositions des articles 313-3 du code de l'environnement de la province Sud une contrepartie financière égale à 2 % du montant des ventes des produits dérivés de la ressource collectée avant imposition.

Les versements s'effectuent au 31 mai de chaque année sur la base du décompte annuel.

## **Article 6 – Responsabilités**

Le récolteur devra indemniser le propriétaire foncier de tous préjudices, directs ou indirects, résultant de son fait.

## **Article 7 – Condition suspensive et résolutoire**

Le présent contrat ne prendra effet qu'à la date de délivrance de l'autorisation au récolteur pour l'accès aux ressources biologiques, génétiques et biochimiques concernées par le présent contrat.

## **Article 8 – Modification du contrat**

Le présent contrat pourra être modifié par avenant, à la demande de l'une ou l'autre des parties, dans le respect des dispositions du titre 1<sup>er</sup> du Livre III du code de l'environnement susmentionnées.

## **Article 9 – Résiliation du contrat**

En cas de non-respect par l'une des parties, des engagements respectifs inscrits dans le présent contrat, celui-ci pourra être résilié de plein droit par l'une ou l'autre des parties à l'expiration d'un délai d'un mois suivant l'envoi d'une lettre recommandée avec accusé de réception valant mise en demeure d'avoir à remplir ses obligations

Toutefois, le présent contrat pourra être résilié de plein droit et sans délai, en cas de retrait de l'autorisation provinciale.



**Article 10**

Le présent contrat est établi en deux exemplaires originaux.

**Article 11 – Lois applicables**

Le présent contrat est soumis aux lois et règlements applicables en Nouvelle-Calédonie.

**Article 12 – Compétence juridictionnelle**

Les litiges éventuels entre les parties relatifs à l'existence, la validité, l'interprétation, l'exécution et la résiliation du présent contrat (ou de l'une quelconque de ses clauses), que les parties ne pourraient pas résoudre à l'amiable, seront portés devant la juridiction compétente de Nouvelle-Calédonie.

Fait à .....Rennes.....,

le .....24/09/2011.....

En deux exemplaires originaux.

**Le propriétaire foncier**

Pour le Président et par délégation  
Le Directeur de l'Environnement

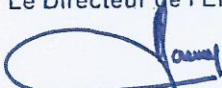  
J. FOURMY

**Le récolteur**

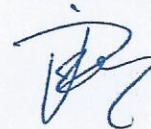

Annexe 1 Plantes

| Famille       | Genre           | Espèce          | Type d'échantillon souhaité | Quantité nécessaire (nombre ou poids) |             |
|---------------|-----------------|-----------------|-----------------------------|---------------------------------------|-------------|
| Araucariaceae | - Araucaria     | - columnaris    | feuilles +                  | 5-10 feuilles                         |             |
|               |                 | - humboldtensis | 1-2 cônes                   | 1-2 cônes                             |             |
|               |                 |                 | mâles et femelles           | 10-20 cônes                           |             |
|               | - Agathis       | - ovata         | + résine                    | ↓                                     |             |
|               |                 | - lanceolata    | ↓                           |                                       | pour chaque |
|               |                 | - moorei        | pour chaque espèce          |                                       | espèce      |
| Podocarpaceae | - Dacrydium     | - araucarioides |                             |                                       |             |
|               |                 | - balansae      | idem                        | idem                                  |             |
|               | - Falcatifolium | - lycopodioides |                             |                                       |             |
|               |                 | - taxoides      |                             |                                       |             |
|               | - Dacrycarpus   | - viellardii    |                             |                                       |             |
|               |                 | - pancheri      | idem                        | idem                                  |             |
|               | - Acropyle      |                 |                             |                                       |             |
|               |                 |                 |                             |                                       |             |



Annexe 2 Plantes

| Espèces | Date ou période de récolte envisagée | Nom des personnes chargées de la récolte              |
|---------|--------------------------------------|-------------------------------------------------------|
|         |                                      |                                                       |
|         |                                      |                                                       |
|         | du 5 au<br>23 Novembre<br>2011       | - Vincent Perrichot (Univ. Rennes 1 -<br>France)      |
|         |                                      | - Alexander Schmidt (Univ. Göttingen<br>Allemagne)    |
|         |                                      | - Leyla Seyfullah (Univ - Göttingen<br>Allemagne)     |
|         |                                      | - Christina Beimforde (Univ - Göttingen<br>Allemagne) |
|         |                                      |                                                       |
|         |                                      |                                                       |
|         |                                      |                                                       |
|         |                                      |                                                       |
|         |                                      |                                                       |
|         |                                      |                                                       |
|         |                                      |                                                       |
|         |                                      |                                                       |

(Insectes) +

Annexe 1 (Cryptogames et champignons)

| Famille                                           | Genre            | Espèce            | Type d'échantillon souhaité                    | Quantité nécessaire (nombre ou poids)                                |
|---------------------------------------------------|------------------|-------------------|------------------------------------------------|----------------------------------------------------------------------|
| - Insectes vivant à proximité des arbres résineux | - indéterminés - | - indéterminées   |                                                |                                                                      |
|                                                   |                  |                   | Insectes capturés puis conservés dans l'alcool | 1-2 insectes de chaque espèce présente                               |
|                                                   |                  |                   |                                                |                                                                      |
|                                                   |                  |                   |                                                |                                                                      |
| - Champignons résineux + Cryptogames              | - indéterminés - | - indéterminées - | fragments de quelques cm -                     | - 2-3 échantillons de chaque espèce présente sur les arbres résineux |
|                                                   |                  |                   |                                                |                                                                      |
|                                                   |                  |                   |                                                |                                                                      |
|                                                   |                  |                   |                                                |                                                                      |
|                                                   |                  |                   |                                                |                                                                      |
|                                                   |                  |                   |                                                |                                                                      |
|                                                   |                  |                   |                                                |                                                                      |
|                                                   |                  |                   |                                                |                                                                      |



Annexe 2

| Espèces                           | Date ou période de récolte envisagée | Nom des personnes chargées de la récolte |
|-----------------------------------|--------------------------------------|------------------------------------------|
|                                   |                                      |                                          |
|                                   |                                      |                                          |
| - insectes -                      | du 5 au<br>23 Novembre<br>2011       | - Vincent PERRICHOT                      |
|                                   |                                      |                                          |
|                                   |                                      |                                          |
|                                   |                                      |                                          |
|                                   |                                      |                                          |
| - Cryptogames<br>+<br>champignons | du 5 au<br>17 Novembre<br>2011       | - Jouko RIKKINEN (Finlande)              |
|                                   |                                      |                                          |
|                                   |                                      |                                          |
|                                   |                                      |                                          |
|                                   |                                      |                                          |
|                                   |                                      |                                          |
|                                   |                                      |                                          |
|                                   |                                      |                                          |
